# Supplementary material for: Is citrate theophylline adenosine dipyridamole (CTAD) better than citrate to survey unfractionated heparin treatment? Has delayed centrifugation a real impact on this survey?
Source: Springer Nature journal article supplement (doi:10.1007/s11239-019-01882-1), 2019-05-16
Supplement: MOESM2 [file 16728902]

| Patient | 1 hour | 2 hours | 3 hours | 4 hours | 5 hours | 6 hours |
| --- | --- | --- | --- | --- | --- | --- |
| 1 | 0.27 | 0.21 | 0.21 | 0.24 | 0.25 | 0.21 |
| 2 | 0.36 | 0.35 | 0.34 | 0.49 | 0.42 | 0.4 |
| 3 | 0.25 | 0.21 | 0.18 | 0.26 | 0.27 | 0.27 |
| 4 | 0.45 | 0.4 | 0.36 | 0.49 | 0.49 | 0.36 |
| 5 | 0.38 | 0.38 | 0.38 | 0.32 | 0.33 | 0.36 |
| 6 | 0.37 | 0.25 | 0.31 | 0.34 | 0.29 | 0.36 |
| 7 | 0.18 | 0.14 | 0.10 | 0.18 | 0.12 | 0.13 |
| 8 | 0.17 | 0.14 | 0.17 | 0.22 | 0.14 | 0.15 |
| 9 | 0.32 | 0.32 | 0.29 | 0.40 | 0.33 | 0.32 |
| 10 | 0.62 | 0.59 | 0.62 | 0.57 | 0.64 | 0.59 |
| 11 | 0.98 | 0.86 | 0.96 | 0.88 | 1.02 | 0.99 |
| 12 | 0.13 | 0.14 | 0.16 | 0.13 | 0.13 | 0.13 |
| 13 | 0.16 | 0.24 | 0.21 | 0.22 | 0.23 | 0.26 |
| 14 | 0.76 | 0.82 | 0.74 | 0.72 | 0.76 | 0.79 |
| 15 | 0.19 | 0.19 | 0.21 | 0.21 | 0.17 | 0.21 |
| 16 | 0.32 | 0.32 | 0.35 | 0.28 | 0.26 | 0.27 |
| 17 | 0.12 | 0.19 | 0.20 | 0.24 | 0.23 | 0.22 |
| 18 | 0.38 | 0.29 | 0.27 | 0.34 | 0.24 | 0.29 |
| 19 | 0.21 | 0.22 | 0.21 | 0.25 | 0.22 | 0.26 |
| 20 | 0.14 | 0.23 | 0.11 | 0.19 | 0.12 | 0.11 |
| 21 | 0.12 | 0.14 | 0.08 | 0.10 | 0.09 | 0.12 |
| 22 | 0.28 | 0.28 | 0.30 | 0.26 | 0.26 | 0.23 |
| 23 | 0.26 | 0.24 | 0.23 | 0.2 | 0.19 | 0.18 |
| 24 | 0.45 | 0.45 | 0.31 | 0.38 | 0.32 | 0.25 |
| 25 | 0.21 | 0.24 | 0.23 | 0.21 | 0.21 | 0.22 |
| 26 | 0.6 | 0.59 | 0.59 | 0.61 | 0.67 | 0.62 |
| 27 | 0.73 | 0.78 | 0.7 | 0.68 | 0.66 | 0.56 |
| 28 | 0.55 | 0.62 | 0.67 | 0.60 | 0.61 | 0.60 |
| 29 | 0.60 | 0.62 | 0.60 | 0.63 | 0.75 | 0.60 |
| 30 | 0.50 | 0.52 | 0.51 | 0.51 | 0.51 | 0.53 |
| 31 | 0.33 | 0.37 | 0.32 | 0.35 | NR | NR |

**Table 2 supplemental. Anti-Xa measurement in 31 patients over the time.** Anti-Xa in UI/ml. NR: not realized
